# Supplementary material
Source: MDPI journal article supplement (https://www.mdpi.com/2075-163X/12/4/474)
Supplement: s1 [file s1]

# Supplementary Materials: Sources of Hydrothermal Fluids Inferred from Oxygen and Carbon Isotope Composition of Calcite, Keweenaw Peninsula Native Copper District, Michigan, USA

Thomas J. Bodden, Theodore J. Bornhorst, Florence Bégué and Chad Deering

**Table S1.** Main-stage stable isotope bulk calcite data from the Kearsarge deposit, collected by Bornhorst and Woodruff [1] but previously unpublished. All of these were determined to be within the temperature zone of pumpellyite = 212.5 °C or pumpellyite/epidote = 245 °C. Bornhorst and Woodruff [1] sample numbers are ###CL# (example: 221CL2). The first three numbers differentiate the samples, the ending number is 1–3, to indicate when there is more than one sample from the same source. Example number 221CL2, the 2 after CL is the 2nd of the 221CL# samples. All of these samples were collected from surface rock piles. Estimated analytical error is 0.2‰.

| Sample Number | Sample Location    | Temperatures (°C) | Measured $\delta^{18}\text{O}_{\text{SMOW}}$ | Calculated $\delta^{18}\text{O}_{\text{H}_2\text{O}}$ | Measured $\delta^{13}\text{C}_{\text{PDB}}$ | Calculated $\delta^{13}\text{C}_{\text{CO}_2}$ |
|---------------|--------------------|-------------------|----------------------------------------------|-------------------------------------------------------|---------------------------------------------|------------------------------------------------|
| 227CL2        | LaSalle #3–4       | 212.5             | 19.3                                         | 10.4                                                  | −3.0                                        | −0.7                                           |
| 218CL1        | LaSalle #3–4       | 212.5             | 15.3                                         | 6.4                                                   | −2.9                                        | −0.6                                           |
| 228CL2        | Centennial #1      | 212.5             | 13.1                                         | 4.2                                                   | −2.8                                        | −0.4                                           |
| 214CL3        | Centennial #1      | 212.5             | 12.7                                         | 3.8                                                   | −2.4                                        | 0.0                                            |
| 214CL2        | South Kearsarge #1 | 245.0             | 13.6                                         | 6.1                                                   | −2.9                                        | 0.0                                            |
| 215CL2        | South Kearsarge #1 | 245.0             | 13.9                                         | 6.5                                                   | −2.3                                        | 0.6                                            |
| 226CL1        | Wolverine #3       | 245.0             | 14.1                                         | 6.6                                                   | −2.2                                        | 0.7                                            |
| 219CL1        | Wolverine #3       | 245.0             | 12.7                                         | 5.2                                                   | −2.9                                        | 0.0                                            |
| 216CL1        | Wolverine #2       | 245.0             | 14.1                                         | 6.6                                                   | −2.5                                        | 0.4                                            |
| 216CL3        | Wolverine #2       | 245.0             | 13.7                                         | 6.2                                                   | −2.7                                        | 0.2                                            |
| 216CL2        | Wolverine #2       | 245.0             | 14.2                                         | 6.8                                                   | −3.2                                        | −0.3                                           |
| 222CL1        | North Kearsarge #1 | 245.0             | 16.5                                         | 9.0                                                   | −3.1                                        | −0.2                                           |
| 223CL1        | North Kearsarge #3 | 245.0             | 13.0                                         | 5.5                                                   | −2.8                                        | 0.1                                            |
| 229CL1        | North Kearsarge #3 | 245.0             | 17.0                                         | 9.5                                                   | −2.7                                        | 0.2                                            |
| 221CL2        | North Kearsarge #3 | 245.0             | 13.6                                         | 6.2                                                   | −1.7                                        | 1.2                                            |
| 230CL1        | North Kearsarge #4 | 245.0             | 18.3                                         | 10.8                                                  | −3.2                                        | −0.3                                           |
| 228CL1        | North Kearsarge #4 | 245.0             | 13.0                                         | 5.5                                                   | −3.0                                        | −0.1                                           |
| 218CL3        | Ahmeek #1          | 245.0             | 17.8                                         | 10.3                                                  | −3.4                                        | −0.5                                           |
| 217CL2        | Ahmeek #1          | 245.0             | 13.8                                         | 6.3                                                   | −3.1                                        | −0.2                                           |
| 219CL3        | Ahmeek #1          | 245.0             | 18.1                                         | 10.7                                                  | −3.2                                        | −0.3                                           |
| 225CL2        | Ahmeek #2          | 245.0             | 13.8                                         | 6.3                                                   | −2.8                                        | 0.1                                            |
| 225CL1        | Ahmeek #2          | 245.0             | 19.1                                         | 11.7                                                  | −3.9                                        | −1.0                                           |
| 220CL2        | Mohawk#6           | 245.0             | 18.1                                         | 10.6                                                  | −3.1                                        | −0.2                                           |
| 224CL3        | Mohawk#5           | 245.0             | 17.6                                         | 10.1                                                  | −2.8                                        | 0.1                                            |
| 224CL2        | Mohawk#5           | 245.0             | 13.2                                         | 5.7                                                   | −3.2                                        | −0.3                                           |
| 221CL3        | Mohawk#4           | 245.0             | 12.6                                         | 5.2                                                   | −3.4                                        | −0.5                                           |
| 218CL2        | Mohawk#4           | 245.0             | 14.0                                         | 6.5                                                   | −2.9                                        | −0.1                                           |
| 219CL2        | Mohawk#4           | 245.0             | 13.7                                         | 6.2                                                   | −2.4                                        | 0.5                                            |
| 215CL3        | Mohawk#4           | 245.0             | 13.8                                         | 6.3                                                   | −3.4                                        | −0.5                                           |
| 215CL1        | Mohawk#4           | 245.0             | 14.2                                         | 6.7                                                   | −2.1                                        | 0.8                                            |
| 223CL2        | Mohawk#3           | 245.0             | 16.7                                         | 9.2                                                   | −2.7                                        | 0.2                                            |
| 220CL3        | Mohawk#3           | 245.0             | 15.3                                         | 7.8                                                   | −2.2                                        | 0.7                                            |
| 228CL3        | Mohawk#2           | 245.0             | 16.6                                         | 9.2                                                   | −4.4                                        | −1.5                                           |
| 222CL3        | Mohawk#2           | 245.0             | 18.7                                         | 11.2                                                  | −3.5                                        | −0.6                                           |
| 224CL1        | Mohawk#2           | 245.0             | 13.9                                         | 6.4                                                   | −3.7                                        | −0.8                                           |
| 225CL3        | Seneca # 2         | 245.0             | 14.8                                         | 7.3                                                   | −3.4                                        | −0.5                                           |
| 221CL1        | Seneca # 2         | 245.0             | 13.8                                         | 6.4                                                   | −2.5                                        | 0.3                                            |
| 222CL2        | Seneca #3          | 245.0             | 13.8                                         | 6.3                                                   | −2.9                                        | 0.0                                            |
| 226CL3        | Seneca #3          | 245.0             | 13.2                                         | 5.7                                                   | −3.0                                        | −0.1                                           |

|        |             |       |      |      |      |      |
|--------|-------------|-------|------|------|------|------|
| 223CL3 | Central #58 | 245.0 | 16.0 | 8.5  | −3.2 | −0.3 |
| 227CL3 | Central #32 | 245.0 | 17.9 | 10.4 | −2.6 | 0.3  |

**Table S2.** Main-stage stable isotope SIMS calcite data for sample TB-293. TB-293 was collected underground from the Quincy mine in vicinity of the intersection of the horizontal adit and the #5 shaft, more than 70 m from the portal and 100 m vertically below the surface. The sample is from a vuggy flow top with mineralogy of calcite, quartz, prehnite, and epidote. The analyzed sample is a vug-filling calcite crystal. This sample was assigned a formation temperature of 212.5 °C (zone of pumpellyite). XMn discussed in text. Measurement error is 2SE. Spot locations provided in Figure S1.

| Sample Number | Spot Location | Analysis Location | Measured $\delta^{18}\text{O}_{\text{SMOW}}$ | $\delta^{18}\text{O}$ Measurement Error | Calculated $\delta^{18}\text{O}_{\text{H}_2\text{O}}$ | Measured $\delta^{13}\text{C}_{\text{PDB}}$ | $\delta^{13}\text{C}$ Measurement Error | Calculated $\delta^{13}\text{C}_{\text{CO}_2}$ | XMn     |
|---------------|---------------|-------------------|----------------------------------------------|-----------------------------------------|-------------------------------------------------------|---------------------------------------------|-----------------------------------------|------------------------------------------------|---------|
| TB-293        | A1            | Quincy Mine       | 18.2                                         | 0.31                                    | 9.3                                                   | −2.5                                        | 0.62                                    | −0.2                                           | 0.00000 |
| TB-293        | A2            | Quincy Mine       | 21.3                                         | 0.33                                    | 12.4                                                  | −5.0                                        | 0.62                                    | −2.7                                           | 0.00000 |
| TB-293        | A3            | Quincy Mine       | 15.9                                         | 0.32                                    | 7.0                                                   | −3.2                                        | 0.61                                    | −0.9                                           | 0.00044 |
| TB-293        | A4            | Quincy Mine       | 16.1                                         | 0.26                                    | 7.2                                                   | −5.0                                        | 0.54                                    | −2.7                                           | 0.00089 |
| TB-293        | A5            | Quincy Mine       | 16.0                                         | 0.34                                    | 7.1                                                   | −9.3                                        | 0.63                                    | −7.0                                           | 0.00070 |
| TB-293        | A6            | Quincy Mine       | 15.7                                         | 0.31                                    | 6.8                                                   | −2.7                                        | 0.66                                    | −0.4                                           | 0.00000 |
| TB-293        | A7            | Quincy Mine       | 16.1                                         | 0.31                                    | 7.2                                                   | not analyzed                                | not analyzed                            | not analyzed                                   | 0.00096 |
| TB-293        | A8            | Quincy Mine       | 16.3                                         | 0.31                                    | 7.4                                                   | −3.6                                        | 0.61                                    | −1.3                                           | 0.00106 |
| TB-293        | A9            | Quincy Mine       | 16.1                                         | 0.33                                    | 7.2                                                   | −4.3                                        | 0.61                                    | −2.0                                           | 0.00106 |
| TB-293        | A10           | Quincy Mine       | 21.1                                         | 0.29                                    | 12.2                                                  | −3.8                                        | 0.62                                    | −1.5                                           | 0.00182 |
| TB-293        | A11           | Quincy Mine       | 16.2                                         | 0.29                                    | 7.3                                                   | −2.9                                        | 0.62                                    | −0.6                                           | 0.00139 |
| TB-293        | A12           | Quincy Mine       | 21.6                                         | 0.29                                    | 12.7                                                  | −6.6                                        | 0.70                                    | −4.3                                           | 0.00000 |
| TB-293        | A13           | Quincy Mine       | 21.7                                         | 0.28                                    | 12.8                                                  | −7.4                                        | 0.62                                    | −5.1                                           | 0.00000 |
| TB-293        | A14           | Quincy Mine       | 20.8                                         | 0.21                                    | 11.9                                                  | −7.2                                        | 0.61                                    | −4.9                                           | 0.00000 |
| TB-293        | A15           | Quincy Mine       | 20.6                                         | 0.34                                    | 11.7                                                  | −6.2                                        | 0.62                                    | −3.9                                           | 0.00070 |
| TB-293        | A16           | Quincy Mine       | 21.1                                         | 0.41                                    | 12.2                                                  | −7.0                                        | 0.62                                    | −4.7                                           | 0.00000 |
| TB-293        | A17           | Quincy Mine       | 22.1                                         | 0.25                                    | 13.2                                                  | −6.2                                        | 0.61                                    | −3.9                                           | 0.00116 |
| TB-293        | A18           | Quincy Mine       | 20.7                                         | 0.23                                    | 11.8                                                  | −4.9                                        | 0.62                                    | −2.6                                           | 0.00036 |
| TB-293        | A19           | Quincy Mine       | 22.0                                         | 0.30                                    | 13.1                                                  | −6.0                                        | 0.68                                    | −3.7                                           | 0.00000 |
| TB-293        | A20           | Quincy Mine       | 18.5                                         | 0.26                                    | 9.6                                                   | −2.1                                        | 0.62                                    | 0.2                                            | 0.00070 |
| TB-293        | A21           | Quincy Mine       | 18.1                                         | 0.41                                    | 9.2                                                   | −2.5                                        | 0.62                                    | −0.2                                           | 0.00000 |
| TB-293        | A22           | Quincy Mine       | 14.6                                         | 0.31                                    | 5.7                                                   | −2.9                                        | 0.57                                    | −0.6                                           | 0.00034 |
| TB-293        | A23           | Quincy Mine       | 17.1                                         | 0.23                                    | 8.2                                                   | −5.8                                        | 0.40                                    | −3.5                                           | 0.00061 |
| TB-293        | A24           | Quincy Mine       | 15.6                                         | 0.30                                    | 6.7                                                   | not analyzed                                | not analyzed                            | not analyzed                                   | 0.00000 |
| TB-293        | A25           | Quincy Mine       | 16.0                                         | 0.25                                    | 7.1                                                   | −2.8                                        | 0.67                                    | −0.5                                           | 0.00097 |
| TB-293        | A26           | Quincy Mine       | 17.3                                         | 0.33                                    | 8.4                                                   | −2.1                                        | 0.62                                    | 0.2                                            | 0.00035 |
| TB-293        | A27           | Quincy Mine       | 16.6                                         | 0.24                                    | 7.7                                                   | −3.4                                        | 0.77                                    | −1.1                                           | 0.00000 |
| TB-293        | A28           | Quincy Mine       | 15.8                                         | 0.25                                    | 6.9                                                   | −3.0                                        | 0.67                                    | −0.7                                           | 0.00052 |
| TB-293        | A29           | Quincy Mine       | 16.0                                         | 0.28                                    | 7.1                                                   | −1.9                                        | 0.60                                    | 0.4                                            | 0.00053 |
| TB-293        | A30           | Quincy Mine       | 21.6                                         | 0.30                                    | 12.7                                                  | −6.2                                        | 0.62                                    | −3.9                                           | 0.00572 |
| TB-293        | A31           | Quincy Mine       | 22.1                                         | 0.29                                    | 13.2                                                  | −7.5                                        | 0.60                                    | −5.2                                           | 0.00579 |
| TB-293        | A32           | Quincy Mine       | 22.2                                         | 0.28                                    | 13.3                                                  | −7.3                                        | 0.65                                    | −5.0                                           | 0.00062 |
| TB-293        | A33           | Quincy Mine       | 21.7                                         | 0.33                                    | 12.8                                                  | −10.1                                       | 0.72                                    | −7.8                                           | 0.00176 |
| TB-293        | A34           | Quincy Mine       | 21.5                                         | 0.33                                    | 12.6                                                  | −9.0                                        | 0.63                                    | −6.7                                           | 0.00321 |
| TB-293        | A35           | Quincy Mine       | 21.4                                         | 0.33                                    | 12.5                                                  | not analyzed                                | not analyzed                            | not analyzed                                   | 0.00027 |
| TB-293        | A36           | Quincy Mine       | 23.4                                         | 0.31                                    | 14.5                                                  | −9.3                                        | 0.63                                    | −7.0                                           | 0.00563 |
| TB-293        | A37           | Quincy Mine       | 22.6                                         | 0.30                                    | 13.7                                                  | −7.4                                        | 0.63                                    | −5.1                                           | 0.00192 |
| TB-293        | A38           | Quincy Mine       | 21.4                                         | 0.35                                    | 12.5                                                  | −5.1                                        | 0.63                                    | −2.8                                           | 0.00009 |
| TB-293        | A39           | Quincy Mine       | 21.9                                         | 0.24                                    | 13.0                                                  | −7.8                                        | 0.55                                    | −5.5                                           | 0.01067 |
| TB-293        | A40           | Quincy Mine       | 20.5                                         | 0.28                                    | 11.6                                                  | −4.0                                        | 0.63                                    | −1.7                                           | 0.00000 |
| TB-293        | A41           | Quincy Mine       | 21.1                                         | 0.39                                    | 12.2                                                  | −7.2                                        | 0.62                                    | −4.9                                           | 0.00207 |
| TB-293        | A42           | Quincy Mine       | 21.9                                         | 0.20                                    | 13.0                                                  | not analyzed                                | not analyzed                            | not analyzed                                   | -       |
| TB-293        | A43           | Quincy Mine       | 23.5                                         | 0.28                                    | 14.6                                                  | not analyzed                                | not analyzed                            | not analyzed                                   | -       |
| TB-293        | A44           | Quincy Mine       | 21.1                                         | 0.26                                    | 12.2                                                  | −4.1                                        | 0.77                                    | −1.8                                           | 0.00314 |
| TB-293        | A45           | Quincy Mine       | 22.8                                         | 0.26                                    | 13.9                                                  | −6.3                                        | 0.63                                    | −4.0                                           | 0.00532 |

**Table S3.** Late-stage stable isotope SIMS calcite data for sample WAS-121. WAS-121 is part of the A. E. Seaman Mineral Museum Research Collection. It was collected underground by W. A. Seaman from the Seneca #2 mine, Kearsarge flow top deposit. The sample is part of a late-stage vein with the minerals calcite, laumontite and natrolite. It was assigned a formation temperature of 150 °C. XMn discussed in text. Measurement error is 2SE. Spot locations provided in Figure S2.

| Sample Number | Spot Location | Analysis Location               | Measured $\delta^{18}\text{O}_{\text{SMOW}}$ | $\delta^{18}\text{O}$ Measurement Error | Calculated $\delta^{18}\text{O}_{\text{H}_2\text{O}}$ | Measured $\delta^{13}\text{C}_{\text{PDB}}$ | $\delta^{13}\text{C}$ Measurement Error | Calculated $\delta^{13}\text{C}_{\text{CO}_2}$ | XMn     |
|---------------|---------------|---------------------------------|----------------------------------------------|-----------------------------------------|-------------------------------------------------------|---------------------------------------------|-----------------------------------------|------------------------------------------------|---------|
| WAS-121       | B1            | Kearsarge Seneca Mine Lake Vein | 14.1                                         | 0.28                                    | −0.5                                                  | −4.6                                        | 0.63                                    | −5.1                                           | 0.00000 |
| WAS-121       | B2            | Kearsarge Seneca Mine Lake Vein | 16.1                                         | 0.32                                    | 1.4                                                   | −9.7                                        | 0.66                                    | −10.2                                          | 0.00000 |
| WAS-121       | B3            | Kearsarge Seneca Mine Lake Vein | 15.6                                         | 0.24                                    | 1.0                                                   | −7.6                                        | 0.67                                    | −8.1                                           | 0.00061 |
| WAS-121       | B4            | Kearsarge Seneca Mine Lake Vein | 15.7                                         | 0.28                                    | 1.0                                                   | −6.4                                        | 0.64                                    | −6.9                                           | 0.00000 |
| WAS-121       | B5            | Kearsarge Seneca Mine Lake Vein | 16.0                                         | 0.23                                    | 1.4                                                   | −8.3                                        | 0.63                                    | −8.8                                           | 0.00000 |
| WAS-121       | B6            | Kearsarge Seneca Mine Lake Vein | 14.5                                         | 0.36                                    | −0.1                                                  | −7.4                                        | 0.63                                    | −7.9                                           | 0.00096 |
| WAS-121       | B7            | Kearsarge Seneca Mine Lake Vein | 14.4                                         | 0.30                                    | −0.3                                                  | −5.9                                        | 0.64                                    | −6.4                                           | 0.00000 |
| WAS-121       | B8            | Kearsarge Seneca Mine Lake Vein | 14.8                                         | 0.29                                    | 0.2                                                   | −9.7                                        | 0.63                                    | −10.2                                          | 0.00000 |
| WAS-121       | B9            | Kearsarge Seneca Mine Lake Vein | 19.0                                         | 0.25                                    | 4.3                                                   | −4.6                                        | 0.63                                    | −5.1                                           | 0.00000 |
| WAS-121       | B10           | Kearsarge Seneca Mine Lake Vein | 20.2                                         | 0.27                                    | 5.6                                                   | −3.6                                        | 0.63                                    | −4.1                                           | 0.00000 |
| WAS-121       | B11           | Kearsarge Seneca Mine Lake Vein | 19.1                                         | 0.29                                    | 4.5                                                   | −3.4                                        | 0.64                                    | −3.9                                           | 0.00071 |
| WAS-121       | B12           | Kearsarge Seneca Mine Lake Vein | 19.2                                         | 0.23                                    | 4.5                                                   | −1.4                                        | 0.64                                    | −1.9                                           | 0.00000 |
| WAS-121       | B13           | Kearsarge Seneca Mine Lake Vein | 19.0                                         | 0.31                                    | 4.3                                                   | −2.9                                        | 0.64                                    | −3.4                                           | 0.00000 |
| WAS-121       | B14           | Kearsarge Seneca Mine Lake Vein | 18.8                                         | 0.36                                    | 4.2                                                   | −1.4                                        | 0.64                                    | −1.9                                           | 0.00000 |
| WAS-121       | B15           | Kearsarge Seneca Mine Lake Vein | 18.3                                         | 0.35                                    | 3.7                                                   | −2.1                                        | 0.64                                    | −2.6                                           | 0.00000 |
| WAS-121       | B16           | Kearsarge Seneca Mine Lake Vein | 19.6                                         | 0.25                                    | 5.0                                                   | −2.4                                        | 0.64                                    | −2.9                                           | 0.00061 |
| WAS-121       | B17           | Kearsarge Seneca Mine Lake Vein | 19.1                                         | 0.26                                    | 4.5                                                   | −2.0                                        | 0.64                                    | −2.5                                           | 0.00000 |
| WAS-121       | B18           | Kearsarge Seneca Mine Lake Vein | 18.7                                         | 0.30                                    | 4.0                                                   | −1.7                                        | 0.64                                    | −2.2                                           | 0.00000 |
| WAS-121       | B19           | Kearsarge Seneca Mine Lake Vein | 17.6                                         | 0.31                                    | 3.0                                                   | −2.9                                        | 0.64                                    | −3.4                                           | 0.00043 |
| WAS-121       | B20           | Kearsarge Seneca Mine Lake Vein | 18.2                                         | 0.28                                    | 3.5                                                   | −2.3                                        | 0.64                                    | −2.8                                           | 0.00105 |
| WAS-121       | B21           | Kearsarge Seneca Mine Lake Vein | 19.4                                         | 0.31                                    | 4.8                                                   | −0.5                                        | 0.66                                    | −1.0                                           | 0.00000 |
| WAS-121       | B22           | Kearsarge Seneca Mine Lake Vein | 18.0                                         | 0.25                                    | 3.4                                                   | −2.3                                        | 0.64                                    | −2.8                                           | 0.00017 |
| WAS-121       | B23           | Kearsarge Seneca Mine Lake Vein | 17.9                                         | 0.29                                    | 3.2                                                   | −3.7                                        | 0.64                                    | −4.2                                           | 0.00000 |
| WAS-121       | B24           | Kearsarge Seneca Mine Lake Vein | 18.6                                         | 0.26                                    | 3.9                                                   | −2.1                                        | 0.64                                    | −2.6                                           | 0.00026 |
| WAS-121       | B25           | Kearsarge Seneca Mine Lake Vein | 18.6                                         | 0.34                                    | 3.9                                                   | −3.2                                        | 0.65                                    | −3.7                                           | 0.00026 |
| WAS-121       | B26           | Kearsarge Seneca Mine Lake Vein | 18.6                                         | 0.23                                    | 4.0                                                   | −3.4                                        | 0.66                                    | −3.9                                           | 0.00000 |
| WAS-121       | B27           | Kearsarge Seneca Mine Lake Vein | 18.3                                         | 0.32                                    | 3.6                                                   | −4.4                                        | 0.64                                    | −4.9                                           | 0.00017 |

|         |     |                                    |      |      |      |      |      |      |         |
|---------|-----|------------------------------------|------|------|------|------|------|------|---------|
| WAS-121 | B28 | Kearsarge Seneca Mine<br>Lake Vein | 17.6 | 0.34 | 2.9  | −3.7 | 0.65 | −4.2 | 0.00000 |
| WAS-121 | B29 | Kearsarge Seneca Mine<br>Lake Vein | 12.7 | 0.26 | −2.0 | −5.2 | 0.64 | −5.7 | 0.00009 |
| WAS-121 | B30 | Kearsarge Seneca Mine<br>Lake Vein | 14.3 | 0.28 | −0.3 | −5.5 | 0.73 | −6.0 | 0.00035 |

**Table S4.** Main-stage stable isotope SIMS calcite data sample WAS752. WAS752 was collected from the Kearsarge Wolverine mine with the minerals calcite, copper, prehnite, and epidote. This sample was assigned a temperature zone of pumpellyite/epidote at 245 °C. XMn discussed in text. Measurement error is 2SE. Spot locations provided in Figure S3.

| Sample Number | Spot Location | Analysis Location        | Measured $\delta^{18}\text{O}_{\text{SMOW}}$ | $\delta^{18}\text{O}$ Measurement Error | Calculated $\delta^{18}\text{O}_{\text{H}_2\text{O}}$ | Measured $\delta^{13}\text{C}_{\text{PDB}}$ | $\delta^{13}\text{C}$ Measurement Error | Calculated $\delta^{13}\text{C}_{\text{CO}_2}$ | XMn     |
|---------------|---------------|--------------------------|----------------------------------------------|-----------------------------------------|-------------------------------------------------------|---------------------------------------------|-----------------------------------------|------------------------------------------------|---------|
| WAS-752a      | C1            | Kearsarge Wolverine Mine | 13.7                                         | 0.29                                    | 6.3                                                   | −6.0                                        | 0.61                                    | −3.1                                           | 0.00105 |
| WAS-752a      | C2            | Kearsarge Wolverine Mine | 13.9                                         | 0.31                                    | 6.5                                                   | −2.7                                        | 0.67                                    | 0.2                                            | 0.00000 |
| WAS-752a      | C3            | Kearsarge Wolverine Mine | 13.9                                         | 0.31                                    | 6.5                                                   | −8.7                                        | 0.95                                    | −5.8                                           | 0.00216 |
| WAS-752a      | C4            | Kearsarge Wolverine Mine | 14.0                                         | 0.25                                    | 6.6                                                   | −2.4                                        | 0.82                                    | 0.5                                            | 0.00044 |
| WAS-752a      | C5            | Kearsarge Wolverine Mine | 13.1                                         | 0.29                                    | 5.7                                                   | −2.2                                        | 0.65                                    | 0.7                                            | 0.00000 |
| WAS-752a      | C6            | Kearsarge Wolverine Mine | 13.9                                         | 0.32                                    | 6.4                                                   | −4.6                                        | 0.63                                    | −1.7                                           | 0.00026 |
| WAS-752a      | C7            | Kearsarge Wolverine Mine | 14.2                                         | 0.30                                    | 6.8                                                   | −6.1                                        | 0.57                                    | −3.2                                           | 0.00111 |
| WAS-752a      | C8            | Kearsarge Wolverine Mine | 13.7                                         | 0.28                                    | 6.2                                                   | −0.2                                        | 0.64                                    | 2.7                                            | 0.00044 |
| WAS-752b      | C9            | Kearsarge Wolverine Mine | 13.2                                         | 0.20                                    | 5.7                                                   | −7.3                                        | 0.54                                    | −4.4                                           | 0.00131 |
| WAS-752b      | C10           | Kearsarge Wolverine Mine | 14.1                                         | 0.33                                    | 6.6                                                   | −2.1                                        | 0.65                                    | 0.8                                            | 0.00036 |
| WAS-752b      | C11           | Kearsarge Wolverine Mine | 13.6                                         | 0.30                                    | 6.2                                                   | −2.2                                        | 0.65                                    | 0.7                                            | 0.00000 |
| WAS-752b      | C12           | Kearsarge Wolverine Mine | 14.3                                         | 0.30                                    | 6.9                                                   | −1.0                                        | 0.97                                    | 1.9                                            | 0.00069 |
| WAS-752b      | C13           | Kearsarge Wolverine Mine | 14.1                                         | 0.30                                    | 6.6                                                   | −2.0                                        | 0.65                                    | 0.9                                            | 0.00087 |
| WAS-752b      | C14           | Kearsarge Wolverine Mine | 13.9                                         | 0.34                                    | 6.5                                                   | −1.3                                        | 0.74                                    | 1.6                                            | 0.00000 |
| WAS-752b      | C15           | Kearsarge Wolverine Mine | 13.8                                         | 0.29                                    | 6.4                                                   | −5.9                                        | 0.57                                    | −3.0                                           | 0.00105 |
| WAS-752b      | C16           | Kearsarge Wolverine Mine | 14.0                                         | 0.28                                    | 6.6                                                   | −2.3                                        | 0.74                                    | 0.6                                            | 0.00000 |
| WAS-752b      | C17           | Kearsarge Wolverine Mine | 13.3                                         | 0.25                                    | 5.9                                                   | −1.6                                        | 0.82                                    | 1.3                                            | 0.00156 |
| WAS-752b      | C18           | Kearsarge Wolverine Mine | 13.6                                         | 0.32                                    | 6.1                                                   | −3.4                                        | 0.65                                    | −0.5                                           | 0.00018 |
| WAS-752b      | C19           | Kearsarge Wolverine Mine | 13.8                                         | 0.33                                    | 6.3                                                   | −1.3                                        | 0.65                                    | 1.6                                            | 0.00018 |
| WAS-752b      | C20           | Kearsarge Wolverine Mine | 13.7                                         | 0.28                                    | 6.3                                                   | −1.8                                        | 0.67                                    | 1.1                                            | 0.00018 |
| WAS-752b      | C21           | Kearsarge Wolverine Mine | 13.6                                         | 0.26                                    | 6.1                                                   | −3.2                                        | 0.63                                    | −0.3                                           | 0.00000 |
| WAS-752b      | C22           | Kearsarge Wolverine Mine | 13.6                                         | 0.29                                    | 6.1                                                   | −4.3                                        | 0.64                                    | −1.4                                           | 0.00069 |
| WAS-752b      | C23           | Kearsarge Wolverine Mine | 13.6                                         | 0.34                                    | 6.1                                                   | −1.8                                        | 0.81                                    | 1.1                                            | 0.00000 |
| WAS-752b      | C24           | Kearsarge Wolverine Mine | 13.6                                         | 0.26                                    | 6.1                                                   | −1.7                                        | 0.65                                    | 1.2                                            | 0.00000 |



|          |     |                          |      |      |     |              |              |              |         |
|----------|-----|--------------------------|------|------|-----|--------------|--------------|--------------|---------|
| WAS-752b | C25 | Kearsarge Wolverine Mine | 13.7 | 0.28 | 6.3 | −2.8         | 0.65         | 0.1          | 0.00000 |
| WAS-752b | C26 | Kearsarge Wolverine Mine | 13.4 | 0.26 | 5.9 | −1.6         | 0.65         | 1.3          | 0.00000 |
| WAS-752b | C27 | Kearsarge Wolverine Mine | 14.0 | 0.29 | 6.5 | −1.5         | 0.63         | 1.4          | 0.00000 |
| WAS-752b | C28 | Kearsarge Wolverine Mine | 14.0 | 0.32 | 6.5 | not analyzed | not analyzed | not analyzed | -       |

**Table S5.** Main-stage stable isotope SIMS calcite data for sample WAS-505. WAS503 is part of the A. E. Seaman Mineral Museum Research Collection. It was collected underground by W. A. Seaman from the Quincy mine, Pewabic flow top deposit. The sample is from the 260 m level of the #6 shaft about 75 m south of the main “spar crossing” from a transverse vein dipping 70°. Calcite, quartz and epidote are associated with native copper. This sample was assigned a formation temperature of 212.5 °C (pumpellyite zone). XMn discussed in text. Measurement error is 2SE. Spot locations provided in Figure S4.

| Sample Number | Spot Location | Analysis Location | Measured $\delta^{18}\text{O}_{\text{SMOW}}$ | $\delta^{18}\text{O}$ Measurement Error | Calculated $\delta^{18}\text{O}_{\text{H}_2\text{O}}$ | Measured $\delta^{13}\text{C}_{\text{PDB}}$ | $\delta^{13}\text{C}$ Measurement Error | Calculated $\delta^{13}\text{C}_{\text{CO}_2}$ | XMn     |
|---------------|---------------|-------------------|----------------------------------------------|-----------------------------------------|-------------------------------------------------------|---------------------------------------------|-----------------------------------------|------------------------------------------------|---------|
| WAS-505       | D1            | Quincy Mine       | 18.9                                         | 0.29                                    | 10.0                                                  | not analyzed                                | not analyzed                            | not analyzed                                   | 0.01707 |
| WAS-505       | D2            | Quincy Mine       | 19.5                                         | 0.32                                    | 10.6                                                  | −5.4                                        | 0.73                                    | −3.1                                           | 0.01608 |
| WAS-505       | D3            | Quincy Mine       | 18.8                                         | 0.53                                    | 9.9                                                   | −5.4                                        | 0.73                                    | −3.1                                           | 0.01650 |
| WAS-505       | D4            | Quincy Mine       | 17.7                                         | 0.32                                    | 8.8                                                   | −4.1                                        | 0.76                                    | −1.7                                           | 0.00000 |
| WAS-505       | D5            | Quincy Mine       | 16.2                                         | 0.33                                    | 7.3                                                   | −3.9                                        | 0.73                                    | −1.6                                           | 0.00048 |
| WAS-505       | D6            | Quincy Mine       | 14.4                                         | 0.33                                    | 5.5                                                   | −3.0                                        | 0.74                                    | −0.7                                           | 0.00042 |
| WAS-505       | D7            | Quincy Mine       | 13.5                                         | 0.43                                    | 4.6                                                   | −2.4                                        | 0.85                                    | −0.1                                           | 0.00191 |
| WAS-505       | D8            | Quincy Mine       | 13.8                                         | 0.36                                    | 4.9                                                   | −3.5                                        | 0.96                                    | −1.1                                           | 0.00066 |
| WAS-505       | D9            | Quincy Mine       | 14.5                                         | 0.32                                    | 5.6                                                   | −2.9                                        | 0.74                                    | −0.6                                           | 0.00048 |
| WAS-505       | D10           | Quincy Mine       | 14.6                                         | 0.36                                    | 5.7                                                   | −2.5                                        | 0.73                                    | −0.1                                           | 0.00243 |
| WAS-505       | D11           | Quincy Mine       | 14.6                                         | 0.34                                    | 5.8                                                   | −2.4                                        | 0.79                                    | 0.0                                            | 0.00089 |
| WAS-505       | D12           | Quincy Mine       | 14.4                                         | 0.35                                    | 5.5                                                   | −3.4                                        | 0.74                                    | −1.1                                           | 0.00000 |
| WAS-505       | D13           | Quincy Mine       | 14.2                                         | 0.30                                    | 5.3                                                   | −3.6                                        | 0.73                                    | −1.3                                           | 0.00165 |
| WAS-505       | D14           | Quincy Mine       | 12.9                                         | 0.40                                    | 4.0                                                   | not analyzed                                | not analyzed                            | not analyzed                                   | 0.00148 |
| WAS-505       | D15           | Quincy Mine       | 15.2                                         | 0.37                                    | 6.3                                                   | −2.4                                        | 0.73                                    | 0.0                                            | 0.00000 |
| WAS-505       | D16           | Quincy Mine       | 14.9                                         | 0.44                                    | 6.1                                                   | −1.7                                        | 0.84                                    | 0.7                                            | 0.00134 |
| WAS-505       | D17           | Quincy Mine       | 15.8                                         | 0.38                                    | 6.9                                                   | −2.2                                        | 0.73                                    | 0.2                                            | 0.00166 |
| WAS-505       | D18           | Quincy Mine       | 18.4                                         | 0.34                                    | 9.5                                                   | −1.2                                        | 0.73                                    | 1.1                                            | 0.00118 |
| WAS-505       | D19           | Quincy Mine       | 18.8                                         | 0.36                                    | 9.9                                                   | −2.0                                        | 0.73                                    | 0.3                                            | 0.00000 |
| WAS-505       | D20           | Quincy Mine       | 19.1                                         | 0.36                                    | 10.2                                                  | −2.4                                        | 0.82                                    | −0.1                                           | 0.00083 |
| WAS-505       | D21           | Quincy Mine       | 17.5                                         | 0.30                                    | 8.6                                                   | −3.3                                        | 0.73                                    | −1.0                                           | 0.00181 |

|         |     |             |      |      |      |              |              |              |         |
|---------|-----|-------------|------|------|------|--------------|--------------|--------------|---------|
| WAS-505 | D22 | Quincy Mine | 18.7 | 0.36 | 9.8  | −3.3         | 0.74         | −0.9         | 0.00000 |
| WAS-505 | D23 | Quincy Mine | 17.2 | 0.33 | 8.3  | −2.6         | 0.79         | −0.3         | 0.00036 |
| WAS-505 | D24 | Quincy Mine | 18.1 | 0.36 | 9.2  | −2.7         | 1.05         | −0.4         | 0.00000 |
| WAS-505 | D25 | Quincy Mine | 18.1 | 0.50 | 9.2  | not analyzed | not analyzed | not analyzed | -       |
| WAS-505 | D26 | Quincy Mine | 17.5 | 0.30 | 8.6  | not analyzed | not analyzed | not analyzed | 0.00388 |
| WAS-505 | D27 | Quincy Mine | 18.2 | 0.27 | 9.3  | not analyzed | not analyzed | not analyzed | 0.00265 |
| WAS-505 | D28 | Quincy Mine | 17.7 | 0.30 | 8.8  | not analyzed | not analyzed | not analyzed | 0.00047 |
| WAS-505 | D29 | Quincy Mine | 17.4 | 0.33 | 8.5  | not analyzed | not analyzed | not analyzed | 0.00112 |
| WAS-505 | D30 | Quincy Mine | 14.7 | 0.35 | 5.8  | −2.5         | 0.76         | −0.2         | 0.00012 |
| WAS-505 | D31 | Quincy Mine | 14.2 | 0.33 | 5.3  | −2.3         | 0.78         | 0.1          | 0.00118 |
| WAS-505 | D32 | Quincy Mine | 18.5 | 0.31 | 9.6  | −1.1         | 0.75         | 1.2          | 0.00099 |
| WAS-505 | D33 | Quincy Mine | 18.6 | 0.33 | 9.7  | −1.5         | 0.80         | 0.8          | 0.01273 |
| WAS-505 | D34 | Quincy Mine | 20.0 | 0.32 | 11.1 | −2.1         | 0.82         | 0.2          | 0.01801 |
| WAS-505 | D35 | Quincy Mine | 19.3 | 0.36 | 10.4 | −1.3         | 0.73         | 1.0          | 0.00111 |
| WAS-505 | D36 | Quincy Mine | 17.0 | 0.39 | 8.1  | not analyzed | not analyzed | not analyzed | 0.00035 |
| WAS-505 | D37 | Quincy Mine | 15.9 | 0.25 | 7.0  | not analyzed | not analyzed | not analyzed | 0.00738 |

**Table S6.** Main-stage stable isotope SIMS calcite data for sample CAL-94-29. CAL-94-29 is part of the A. E. Seaman Mineral Museum Research Collection. It was collected underground by T. J. Bornhorst from a freshly blasted mineralized pocket at the base of the Knowlton flow top about 15 m up dip from the horizontal adit of the Caledonia Mine, which is parallel to the strike of the flow top, at about the 220 m marker along the adit. The pocket appears to be fracture controlled with strike of pocket parallel to strike of the flow top but dip of pocket steeper than the dip of the flow top [2]. Calcite, quartz, and epidote are associated with native copper. It was assigned a formation temperature of 245 °C (pumpellyite/epidote zone). XMn discussed in text. Measurement error is 2SE. Spot locations provided in Figure S5.

| Sample Number | Spot Location | Analysis Location | Measured $\delta^{18}\text{O}_{\text{SMOW}}$ | $\delta^{18}\text{O}$ Measurement Error | Calculated $\delta^{18}\text{O}_{\text{H}_2\text{O}}$ | Measured $\delta^{13}\text{C}_{\text{PDB}}$ | $\delta^{13}\text{C}$ Measurement Error | Calculated $\delta^{13}\text{C}_{\text{CO}_2}$ | XMn     |
|---------------|---------------|-------------------|----------------------------------------------|-----------------------------------------|-------------------------------------------------------|---------------------------------------------|-----------------------------------------|------------------------------------------------|---------|
| CAL-94-29     | E1            | Caledonia Mine    | 12.7                                         | 0.32                                    | 5.2                                                   | −4.7                                        | 0.68                                    | −1.8                                           | 0.00080 |
| CAL-94-29     | E2            | Caledonia Mine    | 12.9                                         | 0.34                                    | 5.4                                                   | −3.4                                        | 0.72                                    | −0.6                                           | 0.00030 |
| CAL-94-29     | E3            | Caledonia Mine    | 12.2                                         | 0.40                                    | 4.7                                                   | −2.9                                        | 0.80                                    | 0.0                                            | 0.00128 |
| CAL-94-29     | E4            | Caledonia Mine    | 12.6                                         | 0.34                                    | 5.1                                                   | −3.1                                        | 0.70                                    | −0.3                                           | 0.00055 |
| CAL-94-29     | E5            | Caledonia Mine    | 12.2                                         | 0.37                                    | 4.7                                                   | −4.0                                        | 0.77                                    | −1.1                                           | 0.00018 |
| CAL-94-29     | E6            | Caledonia Mine    | 12.6                                         | 0.35                                    | 5.1                                                   | −3.5                                        | 0.67                                    | −0.6                                           | 0.00036 |
| CAL-94-29     | E7            | Caledonia Mine    | 12.2                                         | 0.40                                    | 4.7                                                   | −4.1                                        | 0.67                                    | −1.2                                           | 0.00079 |
| CAL-94-29     | E8            | Caledonia Mine    | 11.6                                         | 0.40                                    | 4.2                                                   | −3.7                                        | 0.71                                    | −0.8                                           | 0.00230 |

|           |     |                |      |      |     |              |              |              |         |
|-----------|-----|----------------|------|------|-----|--------------|--------------|--------------|---------|
| CAL-94-29 | E9  | Caledonia Mine | 11.9 | 0.41 | 4.4 | not analyzed | not analyzed | not analyzed | 0.00171 |
| CAL-94-29 | E10 | Caledonia Mine | 12.3 | 0.47 | 4.8 | not analyzed | not analyzed | not analyzed | 0.00036 |
| CAL-94-29 | E11 | Caledonia Mine | 12.3 | 0.48 | 4.8 | −1.9         | 0.73         | 1.0          | 0.00030 |
| CAL-94-29 | E12 | Caledonia Mine | 12.3 | 0.47 | 4.9 | −3.7         | 0.67         | −0.8         | 0.00145 |

**Table S7.** Main-stage stable isotope SIMS calcite data for sample MOR-1. MOR-1 is part of the A. E. Seaman Mineral Museum Research Collection. It was from the collection of Arthur Moretta and is from the Quincy Mine in vicinity of the #5 or #6 shaft and likely above the 10th level or 150 m vertically below the surface (Pewabic flow top deposit. This sample is a single vug-filling transparent calcite crystal about 3 cm tall. There are many inclusions of native copper. It was assigned a formation temperature of 215.5 °C (pumpellyite zone). XMn discussed in text. Measurement error is 2SE. Spot locations provided in Figure S6.

| Sample Number | Spot Location | Analysis Location | Measured $\delta^{18}\text{O}_{\text{SMOW}}$ | $\delta^{18}\text{O}$ Measurement Error | Calculated $\delta^{18}\text{O}_{\text{H}_2\text{O}}$ | Measured $\delta^{13}\text{C}_{\text{PDB}}$ | $\delta^{13}\text{C}$ Measurement Error | Calculated $\delta^{13}\text{C}_{\text{CO}_2}$ | XMn     |
|---------------|---------------|-------------------|----------------------------------------------|-----------------------------------------|-------------------------------------------------------|---------------------------------------------|-----------------------------------------|------------------------------------------------|---------|
| MOR-1         | F1            | Quincy Mine       | 18.4                                         | 0.43                                    | 9.5                                                   | −5.0                                        | 0.63                                    | −2.6                                           | 0.00000 |
| MOR-1         | F2            | Quincy Mine       | 18.0                                         | 0.52                                    | 9.1                                                   | −4.5                                        | 0.63                                    | −2.2                                           | 0.00000 |
| MOR-1         | F3            | Quincy Mine       | 18.7                                         | 0.47                                    | 9.8                                                   | −3.7                                        | 0.69                                    | −1.4                                           | 0.00029 |
| MOR-1         | F4            | Quincy Mine       | 17.9                                         | 0.43                                    | 9.0                                                   | −2.6                                        | 0.64                                    | −0.3                                           | 0.00012 |
| MOR-1         | F5            | Quincy Mine       | 18.5                                         | 0.45                                    | 9.6                                                   | −1.3                                        | 0.66                                    | 1.0                                            | 0.00152 |
| MOR-1         | F6            | Quincy Mine       | 16.9                                         | 0.54                                    | 8.0                                                   | −2.9                                        | 0.64                                    | −0.6                                           | 0.00053 |
| MOR-1         | F7            | Quincy Mine       | 16.5                                         | 0.36                                    | 7.6                                                   | −2.0                                        | 0.67                                    | 0.3                                            | 0.00053 |
| MOR-1         | F8            | Quincy Mine       | 18.2                                         | 0.44                                    | 9.3                                                   | −2.9                                        | 0.70                                    | −0.6                                           | 0.00199 |

**Table S8.** Main-stage stable isotope SIMS calcite data for sample DK-1. DK-1 is part of the A. E. Seaman Mineral Museum Research Collection. It was collected by D. Kelly from the Seneca #1 mine surface rock pile, Kearsarge flow top deposit. Calcite is associated with native copper. It was assigned a formation temperature of at 245 °C (pumpellyite/epidote zone). XMn discussed in text. Measurement error is 2SE. Spot locations provided in Figure S7.

| Sample Number | Spot Location | Analysis Location             | Measured $\delta^{18}\text{O}_{\text{SMOW}}$ | $\delta^{18}\text{O}$ Measurement Error | Calculated $\delta^{18}\text{O}_{\text{H}_2\text{O}}$ | Measured $\delta^{13}\text{C}_{\text{PDB}}$ | $\delta^{13}\text{C}$ Measurement Error | Calculated $\delta^{13}\text{C}_{\text{CO}_2}$ | XMn     |
|---------------|---------------|-------------------------------|----------------------------------------------|-----------------------------------------|-------------------------------------------------------|---------------------------------------------|-----------------------------------------|------------------------------------------------|---------|
| DK-1a         | G1            | Kearsarge deposit/Seneca Mine | 20.0                                         | 0.48                                    | 12.6                                                  | −4.3                                        | 0.66                                    | −1.4                                           | 0.00000 |
| DK-1a         | G2            | Kearsarge deposit/Seneca Mine | 20.1                                         | 0.44                                    | 12.6                                                  | −4.4                                        | 0.74                                    | −1.5                                           | 0.00000 |
| DK-1a         | G3            | Kearsarge deposit/Seneca Mine | 20.7                                         | 0.46                                    | 13.2                                                  | −1.9                                        | 0.64                                    | 0.9                                            | 0.00134 |
| DK-1a         | G4            | Kearsarge deposit/Seneca Mine | 20.1                                         | 0.48                                    | 12.7                                                  | −3.1                                        | 0.66                                    | −0.2                                           | 0.00180 |
| DK-1a         | G5            | Kearsarge deposit/Seneca Mine | 20.6                                         | 0.43                                    | 13.2                                                  | −3.9                                        | 0.64                                    | −1.0                                           | 0.00000 |
| DK-1a         | G6            | Kearsarge deposit/Seneca Mine | 20.8                                         | 0.49                                    | 13.3                                                  | −3.6                                        | 0.63                                    | −0.7                                           | 0.00053 |
| DK-1a         | G7            | Kearsarge deposit/Seneca Mine | 20.2                                         | 0.47                                    | 12.7                                                  | −4.3                                        | 0.64                                    | −1.4                                           | 0.00088 |
| DK-1a         | G8            | Kearsarge deposit/Seneca Mine | 19.3                                         | 0.56                                    | 11.8                                                  | −4.1                                        | 0.64                                    | −1.2                                           | 0.00029 |
| DK-1a         | G9            | Kearsarge deposit/Seneca Mine | 17.9                                         | 0.42                                    | 10.5                                                  | not analyzed                                | not analyzed                            | not analyzed                                   | 0.00222 |
| DK-1a         | G10           | Kearsarge deposit/Seneca Mine | 17.0                                         | 0.48                                    | 9.5                                                   | −4.3                                        | 0.63                                    | −1.5                                           | 0.00342 |
| DK-1a         | G11           | Kearsarge deposit/Seneca Mine | 15.9                                         | 0.42                                    | 8.5                                                   | −7.6                                        | 0.62                                    | −4.7                                           | 0.00449 |
| DK-1a         | G12           | Kearsarge deposit/Seneca Mine | 20.8                                         | 0.44                                    | 13.3                                                  | −5.2                                        | 0.74                                    | −2.3                                           | 0.00000 |

|       |     |                               |      |      |      |              |              |              |         |
|-------|-----|-------------------------------|------|------|------|--------------|--------------|--------------|---------|
| DK-1a | G13 | Kearsarge deposit/Seneca Mine | 19.3 | 0.36 | 11.8 | −2.7         | 0.67         | 0.2          | 0.00006 |
| DK-1a | G14 | Kearsarge deposit/Seneca Mine | 19.9 | 0.42 | 12.4 | not analyzed | not analyzed | not analyzed | 0.00017 |
| DK-1a | G15 | Kearsarge deposit/Seneca Mine | 20.1 | 0.39 | 12.6 | −4.6         | 0.82         | −1.7         | 0.00012 |
| DK-1a | G16 | Kearsarge deposit/Seneca Mine | 20.0 | 0.32 | 12.5 | −8.2         | 0.70         | −5.3         | 0.00730 |
| DK-1a | G17 | Kearsarge deposit/Seneca Mine | 17.7 | 0.41 | 10.3 | −5.3         | 0.63         | −2.4         | 0.00255 |
| DK-1a | G18 | Kearsarge deposit/Seneca Mine | 17.0 | 0.36 | 9.6  | −10.2        | 0.63         | −7.3         | 0.00320 |
| DK-1a | G19 | Kearsarge deposit/Seneca Mine | 17.0 | 0.41 | 9.5  | −6.4         | 0.63         | −3.5         | 0.00000 |
| DK-1a | G20 | Kearsarge deposit/Seneca Mine | 19.0 | 0.34 | 11.5 | −6.1         | 0.63         | −3.3         | 0.00245 |
| DK-1a | G21 | Kearsarge deposit/Seneca Mine | 18.6 | 0.52 | 11.2 | −4.8         | 0.71         | −1.9         | 0.00477 |
| DK-1a | G22 | Kearsarge deposit/Seneca Mine | 14.5 | 0.41 | 7.1  | −8.7         | 0.63         | −5.8         | 0.00029 |
| DK-1b | G23 | Kearsarge deposit/Seneca Mine | 18.7 | 0.47 | 11.3 | −1.8         | 0.64         | 1.1          | 0.00053 |
| DK-1b | G24 | Kearsarge deposit/Seneca Mine | 17.9 | 0.43 | 10.5 | −1.7         | 0.64         | 1.2          | 0.00098 |
| DK-1b | G25 | Kearsarge deposit/Seneca Mine | 17.5 | 0.36 | 10.1 | −2.5         | 0.80         | 0.4          | 0.00000 |
| DK-1b | G26 | Kearsarge deposit/Seneca Mine | 18.4 | 0.42 | 10.9 | −3.0         | 0.64         | −0.1         | 0.00058 |
| DK-1b | G27 | Kearsarge deposit/Seneca Mine | 17.9 | 0.51 | 10.5 | −1.8         | 0.65         | 1.1          | 0.00100 |
| DK-1b | G28 | Kearsarge deposit/Seneca Mine | 18.2 | 0.42 | 10.8 | −1.4         | 0.73         | 1.5          | 0.00055 |
| DK-1b | G29 | Kearsarge deposit/Seneca Mine | 18.1 | 0.37 | 10.6 | −1.1         | 0.69         | 1.8          | 0.00064 |
| DK-1b | G30 | Kearsarge deposit/Seneca Mine | 18.5 | 0.35 | 11.0 | −2.7         | 0.64         | 0.2          | 0.00000 |
| DK-1b | G31 | Kearsarge deposit/Seneca Mine | 17.3 | 0.50 | 9.8  | −3.1         | 0.64         | −0.2         | 0.00064 |
| DK-1b | G32 | Kearsarge deposit/Seneca Mine | 17.2 | 0.51 | 9.8  | −5.1         | 0.73         | −2.2         | 0.00006 |
| DK-1b | G33 | Kearsarge deposit/Seneca Mine | 17.4 | 0.41 | 10.0 | −2.1         | 0.64         | 0.8          | 0.00000 |

**Table S9.** Late-stage stable isotope SIMS calcite data for sample CM-1. CM-1 is part of the A. E. Seaman Mineral Museum Research Collection, also labeled CAL 94-7. It was collected underground by T. Bornhorst at the 195 m marker along the main adit which is parallel to the strike of the Knowlton flow top at the Caledonia Mine. An approximately 10 cm wide vein with strike perpendicular to the flow top deposit and near vertical dip. The barren vein clearly cross cuts the native copper mineralized Knowlton flow top deposit. This is a late-stage vein with calcite and laumontite and lacking native copper [2]. It was assigned formation temperature of 150 °C. XMn discussed in text. Measurement error is 2SE. Spot locations provided in Figure S8.

| Sample Number | Spot Location | Analysis Location | Measured $\delta^{18}\text{O}_{\text{SMOW}}$ | $\delta^{18}\text{O}$ Measurement Error | Calculated $\delta^{18}\text{O}_{\text{H}_2\text{O}}$ | Measured $\delta^{13}\text{C}_{\text{PDB}}$ | $\delta^{13}\text{C}$ Measurement Error | Calculated $\delta^{13}\text{C}_{\text{CO}_2}$ | XMn     |
|---------------|---------------|-------------------|----------------------------------------------|-----------------------------------------|-------------------------------------------------------|---------------------------------------------|-----------------------------------------|------------------------------------------------|---------|
| CM-1a         | H1            | Caledonia Mine    | 17.5                                         | 0.44                                    | 2.9                                                   | not analyzed                                | not analyzed                            | not analyzed                                   | 0.00000 |
| CM-1a         | H2            | Caledonia Mine    | 17.2                                         | 0.39                                    | 2.5                                                   | −8.5                                        | 0.88                                    | −8.9                                           | 0.00088 |
| CM-1a         | H3            | Caledonia Mine    | 16.1                                         | 0.42                                    | 1.4                                                   | −7.1                                        | 0.68                                    | −7.6                                           | 0.00000 |

|       |     |                |      |      |     |       |      |       |         |
|-------|-----|----------------|------|------|-----|-------|------|-------|---------|
| CM-1a | H4  | Caledonia Mine | 16.1 | 0.41 | 1.4 | −10.4 | 0.88 | −10.9 | 0.00059 |
| CM-1a | H5  | Caledonia Mine | 16.4 | 0.48 | 1.7 | −9.9  | 0.64 | −10.4 | 0.00053 |
| CM-1a | H6  | Caledonia Mine | 16.6 | 0.38 | 1.9 | −9.8  | 0.65 | −10.3 | 0.00000 |
| CM-1a | H7  | Caledonia Mine | 16.7 | 0.39 | 2.0 | −9.1  | 0.72 | −9.6  | 0.00000 |
| CM-1a | H8  | Caledonia Mine | 17.2 | 0.51 | 2.6 | −8.3  | 0.68 | −8.8  | 0.00047 |
| CM-1a | H9  | Caledonia Mine | 16.9 | 0.31 | 2.2 | −9.0  | 0.72 | −9.5  | 0.00012 |
| CM-1a | H10 | Caledonia Mine | 17.3 | 0.43 | 2.7 | −7.8  | 0.64 | −8.2  | 0.00000 |
| CM-1a | H11 | Caledonia Mine | 17.1 | 0.58 | 2.4 | −9.0  | 0.64 | −9.5  | 0.00000 |
| CM-1a | H12 | Caledonia Mine | 17.0 | 0.48 | 2.4 | −9.8  | 0.64 | −10.2 | 0.00029 |
| CM-1a | H13 | Caledonia Mine | 17.3 | 0.48 | 2.6 | −8.5  | 0.64 | −9.0  | 0.00081 |
| CM-1a | H14 | Caledonia Mine | 17.5 | 0.41 | 2.8 | −8.4  | 0.90 | −8.9  | 0.00041 |
| CM-1a | H15 | Caledonia Mine | 17.4 | 0.47 | 2.8 | −8.3  | 0.70 | −8.8  | 0.00023 |
| CM-1a | H16 | Caledonia Mine | 17.8 | 0.44 | 3.2 | −8.5  | 0.67 | −9.0  | 0.00000 |
| CM-1b | H17 | Caledonia Mine | 16.5 | 0.40 | 1.8 | −10.7 | 0.64 | −11.2 | 0.00081 |
| CM-1b | H18 | Caledonia Mine | 16.8 | 0.53 | 2.2 | −9.5  | 0.73 | −10.0 | 0.00023 |
| CM-1b | H19 | Caledonia Mine | 16.4 | 0.45 | 1.8 | −9.3  | 0.73 | −9.8  | 0.00029 |
| CM-1b | H20 | Caledonia Mine | 18.2 | 0.33 | 3.5 | −10.5 | 0.62 | −11.0 | 0.00023 |
| CM-1b | H21 | Caledonia Mine | 15.4 | 0.42 | 0.8 | −10.2 | 0.63 | −10.7 | 0.00000 |
| CM-1b | H22 | Caledonia Mine | 16.4 | 0.42 | 1.7 | −10.5 | 0.70 | −10.9 | 0.00047 |
| CM-1b | H23 | Caledonia Mine | 16.9 | 0.52 | 2.2 | −9.5  | 0.78 | −10.0 | 0.00052 |
| CM-1b | H24 | Caledonia Mine | 16.8 | 0.45 | 2.2 | −8.8  | 0.64 | −9.3  | 0.00012 |
| CM-1b | H25 | Caledonia Mine | 16.7 | 0.46 | 2.0 | −10.1 | 0.64 | −10.6 | 0.00000 |
| CM-1b | H26 | Caledonia Mine | 17.2 | 0.37 | 2.6 | −9.1  | 0.64 | −9.5  | 0.00140 |
| CM-1b | H27 | Caledonia Mine | 16.9 | 0.57 | 2.2 | −9.2  | 0.74 | −9.7  | 0.00000 |
| CM-1b | H28 | Caledonia Mine | 16.4 | 0.50 | 1.8 | −11.4 | 0.62 | −11.9 | 0.00000 |
| CM-1c | H29 | Caledonia Mine | 16.7 | 0.46 | 2.0 | −8.5  | 0.64 | −9.0  | 0.00134 |
| CM-1c | H30 | Caledonia Mine | 16.9 | 0.42 | 2.2 | −9.7  | 0.64 | −10.2 | 0.00111 |
| CM-1c | H31 | Caledonia Mine | 16.9 | 0.43 | 2.2 | −11.1 | 0.64 | −11.6 | 0.00000 |
| CM-1c | H32 | Caledonia Mine | 17.6 | 0.43 | 2.9 | −10.1 | 0.65 | −10.6 | 0.00000 |
| CM-1c | H33 | Caledonia Mine | 17.7 | 0.44 | 3.1 | −9.2  | 0.64 | −9.7  | 0.00000 |
| CM-1c | H34 | Caledonia Mine | 16.7 | 0.46 | 2.1 | −9.9  | 0.72 | −10.4 | 0.00000 |

|       |     |                |              |              |              |       |      |       |         |
|-------|-----|----------------|--------------|--------------|--------------|-------|------|-------|---------|
| CM-1c | H35 | Caledonia Mine | 18.3         | 0.49         | 3.7          | −9.5  | 0.68 | −10.0 | 0.00111 |
| CM-1c | H36 | Caledonia Mine | 16.3         | 0.54         | 1.7          | −11.6 | 0.65 | −12.1 | 0.00081 |
| CM-1c | H37 | Caledonia Mine | 16.1         | 0.46         | 1.5          | −9.5  | 0.64 | −10.0 | 0.00000 |
| CM-1c | H38 | Caledonia Mine | 17.1         | 0.48         | 2.5          | −9.3  | 0.64 | −9.8  | 0.00000 |
| CM-1c | H39 | Caledonia Mine | 17.5         | 0.50         | 2.8          | −8.7  | 0.64 | −9.2  | 0.00023 |
| CM-1c | H40 | Caledonia Mine | 17.4         | 0.49         | 2.8          | −10.0 | 0.74 | −10.5 | 0.00133 |
| CM-1c | H41 | Caledonia Mine | 17.4         | 0.38         | 2.8          | −8.5  | 0.64 | −9.0  | 0.00070 |
| CM-1c | H42 | Caledonia Mine | 20.7         | 0.59         | 6.0          | −9.1  | 0.64 | −9.6  | 0.00000 |
| CM-1c | H43 | Caledonia Mine | 17.8         | 0.37         | 3.1          | −8.5  | 0.71 | −9.0  | 0.00000 |
| CM-1c | H44 | Caledonia Mine | not analyzed | not analyzed | not analyzed | −9.6  | 0.64 | −10.0 | 0.00000 |

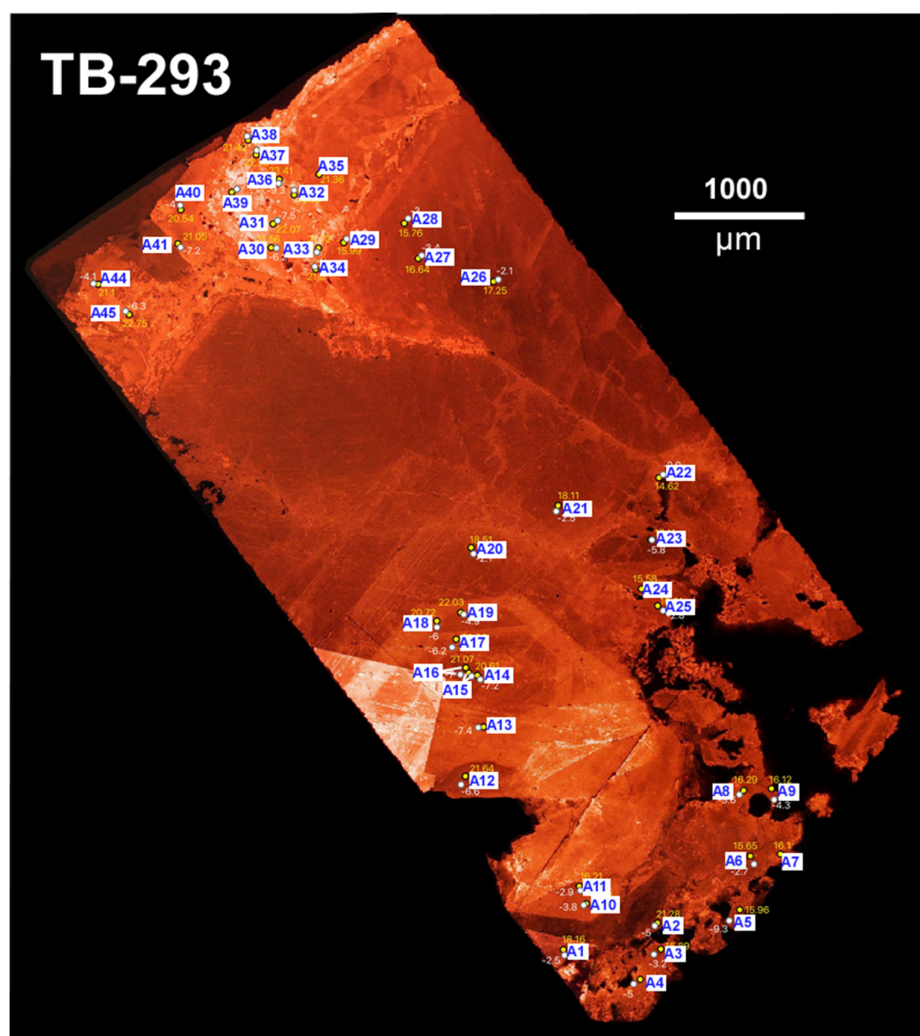

**Figure S1.** Spot Analysis Cathodoluminescence image of TB-293. This sample is from the Quincy mine. Small circles represent spot location for oxygen and carbon isotopic determinations, the labels are the spot locations referenced in Table S2.

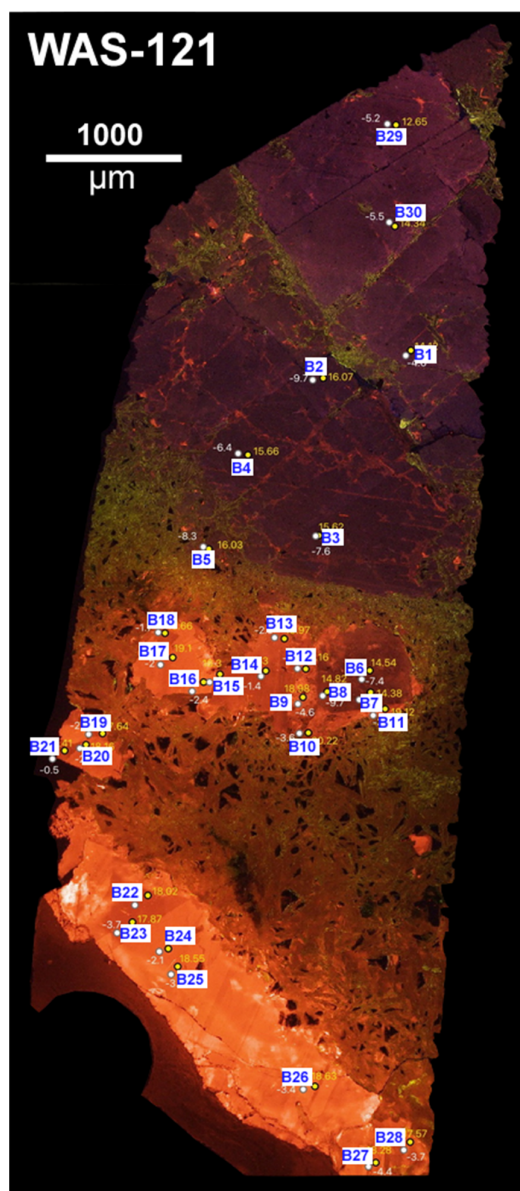

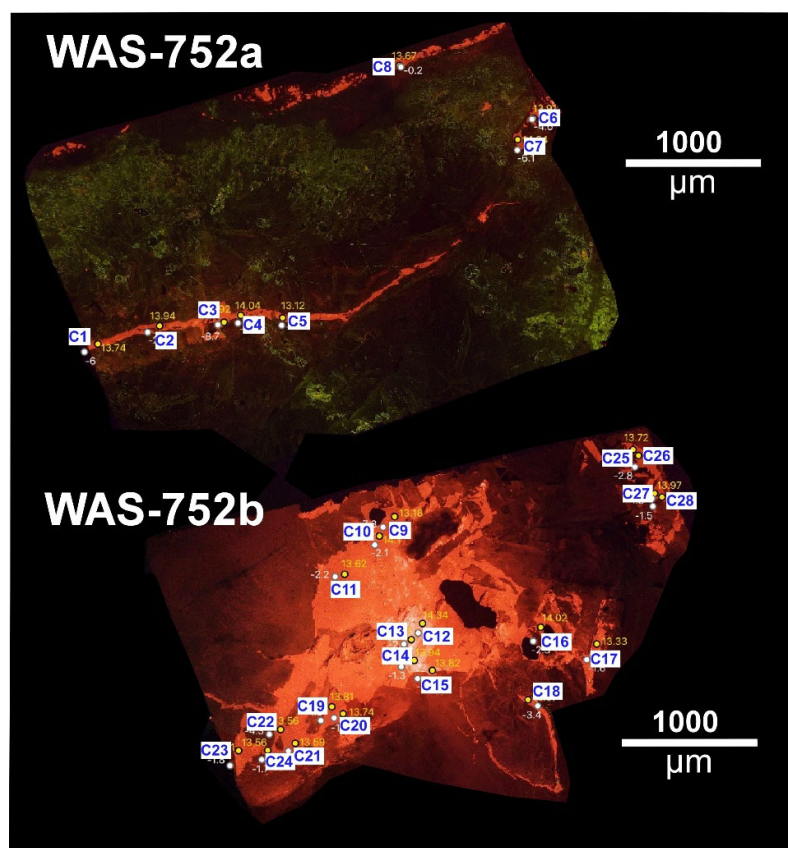



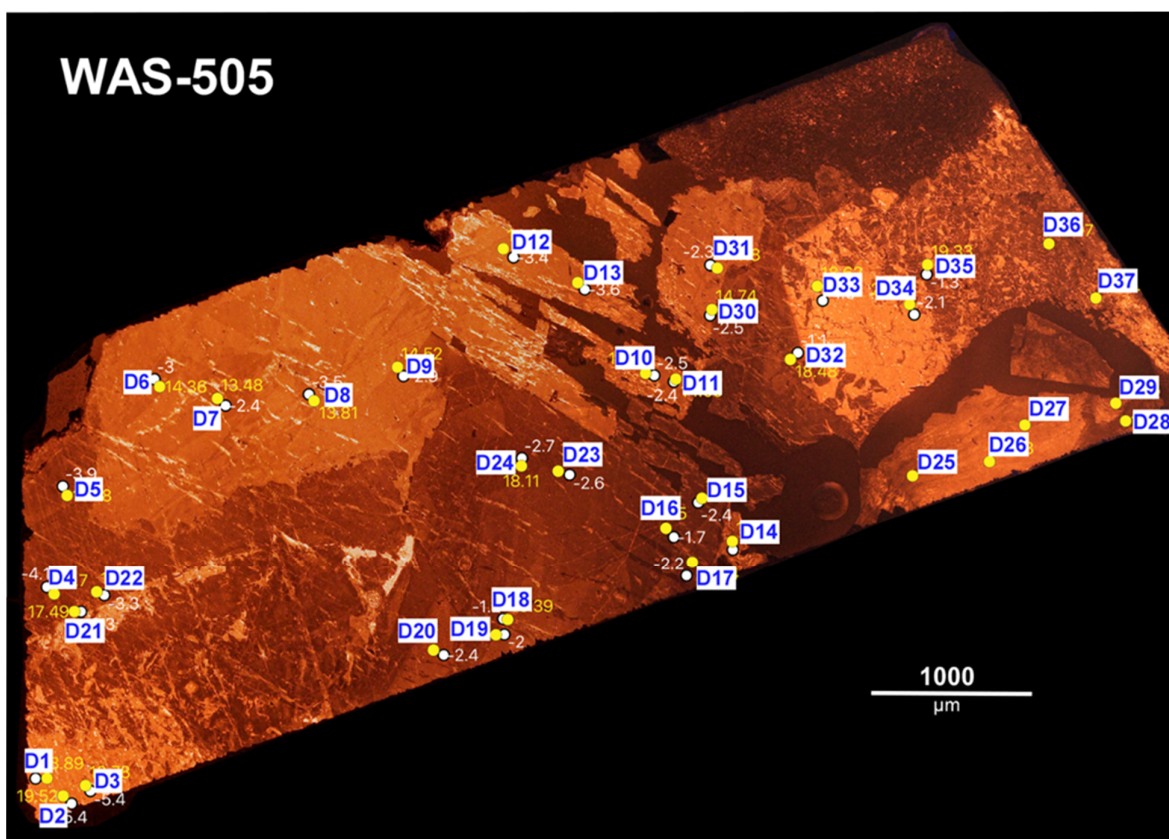

**Figure S4.** Spot analysis cathodoluminescence image of WAS-505. This sample is from the Quincy mine. Small circles represent spot location for oxygen and carbon isotopic determinations, the labels are the spot locations referenced in Table S5.

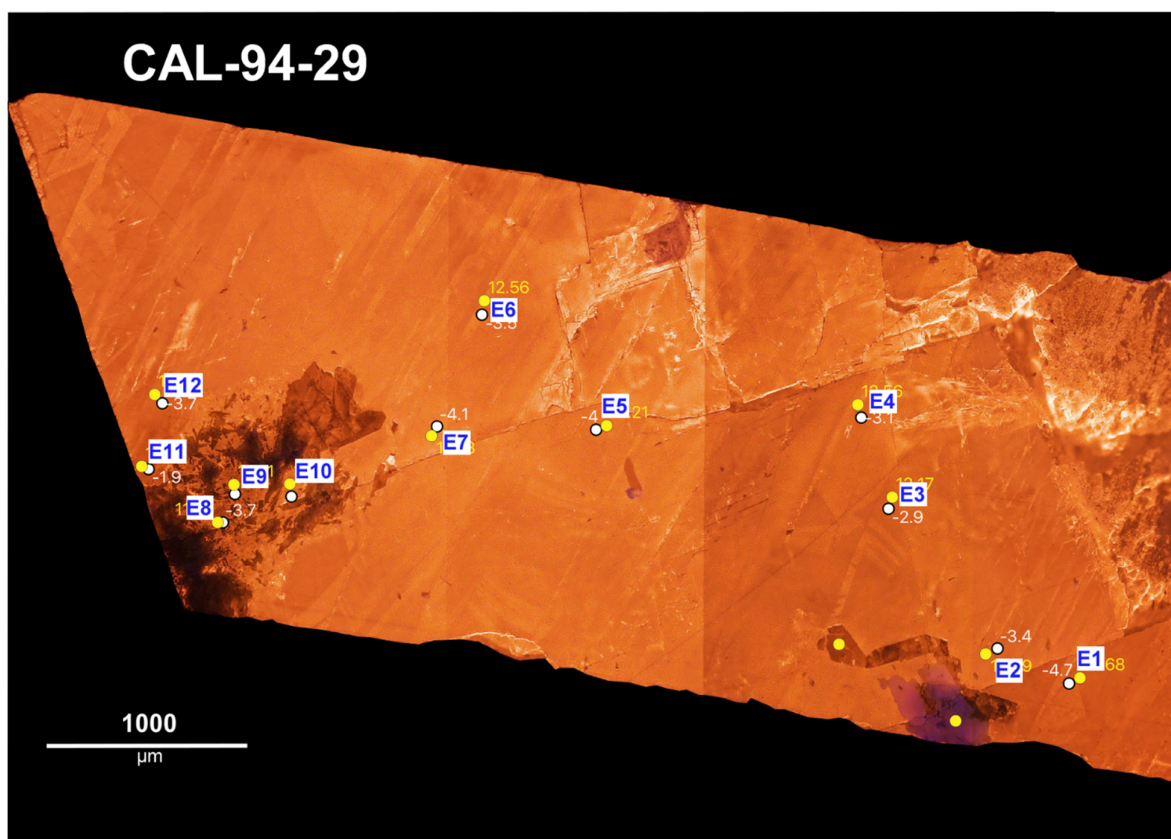

**Figure S5.** Spot analysis cathodoluminescence image of CAL-94-29. This sample is from the Caledonia mine. Small circles represent spot location for oxygen and carbon isotopic determinations, the labels are the spot locations referenced in Table S6.

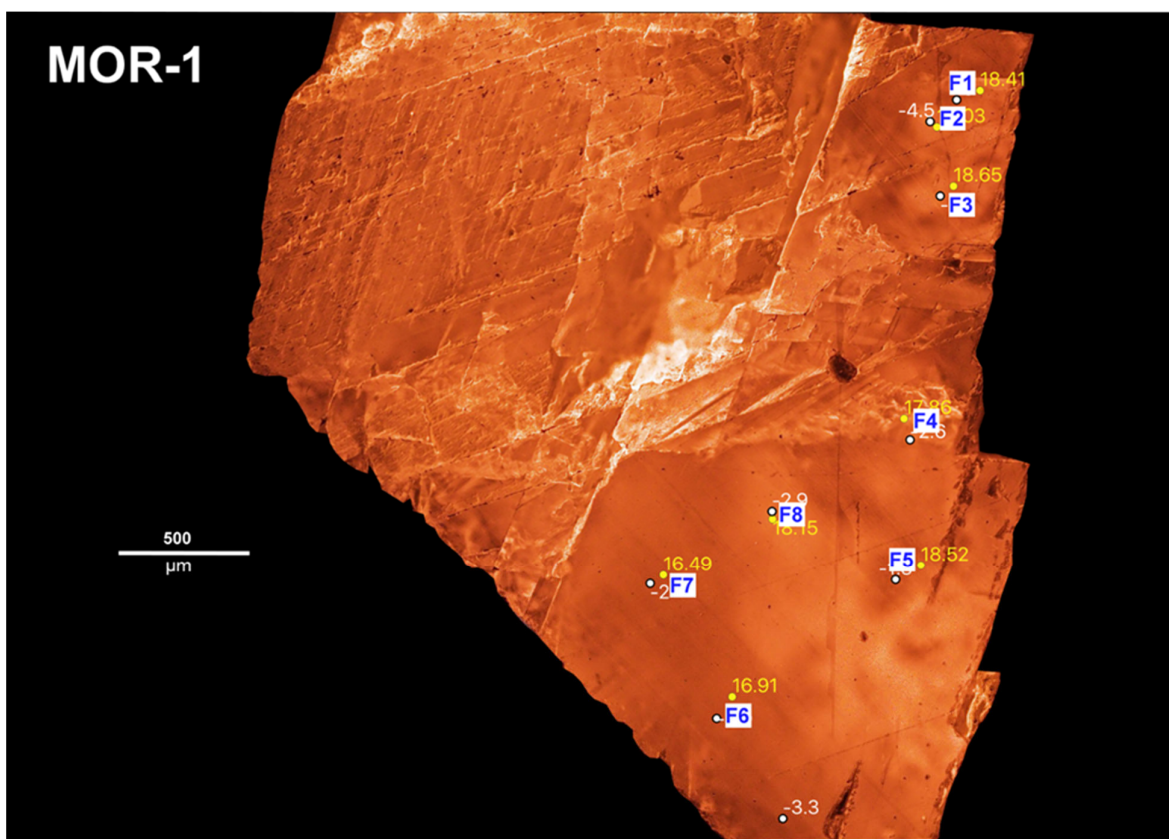

**Figure S6.** Spot analysis cathodoluminescence image of MOR-1. This sample is from the Quincy mine. Small circles represent spot location for oxygen and carbon isotopic determinations, the labels are the spot locations referenced in Table S7.



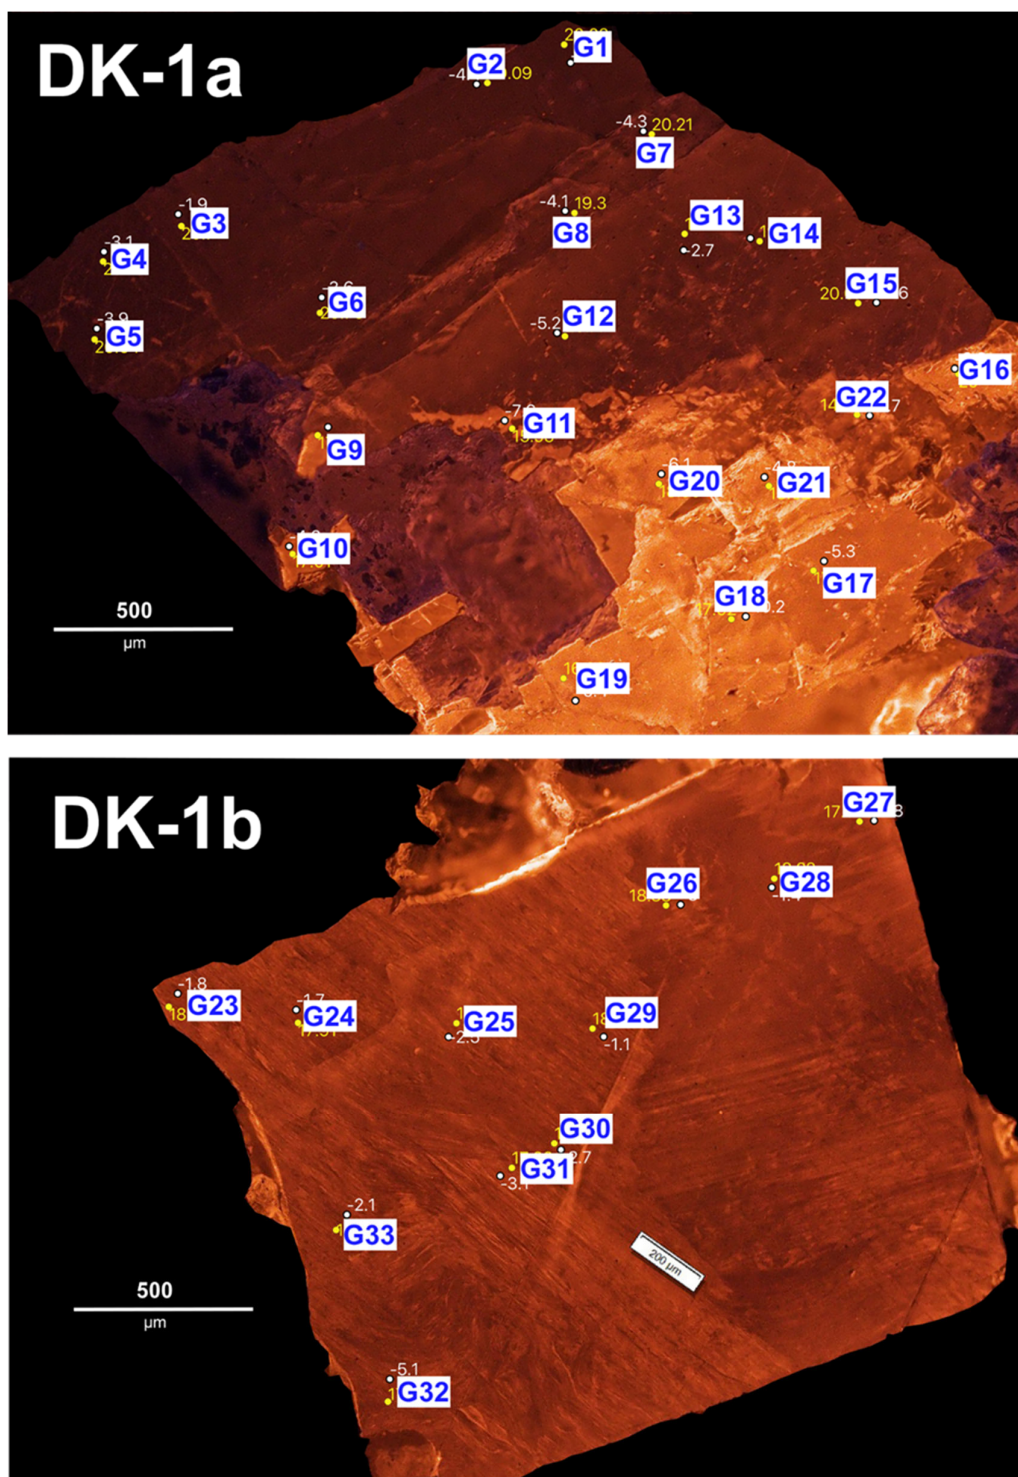

**Figure S7.** Spot analysis cathodoluminescence images of DK-1a and DK-1b. These samples are from the Kearsarge Seneca mine. Small circles represent spot location for oxygen and carbon isotopic determinations, the labels are the spot locations referenced in Table S8.

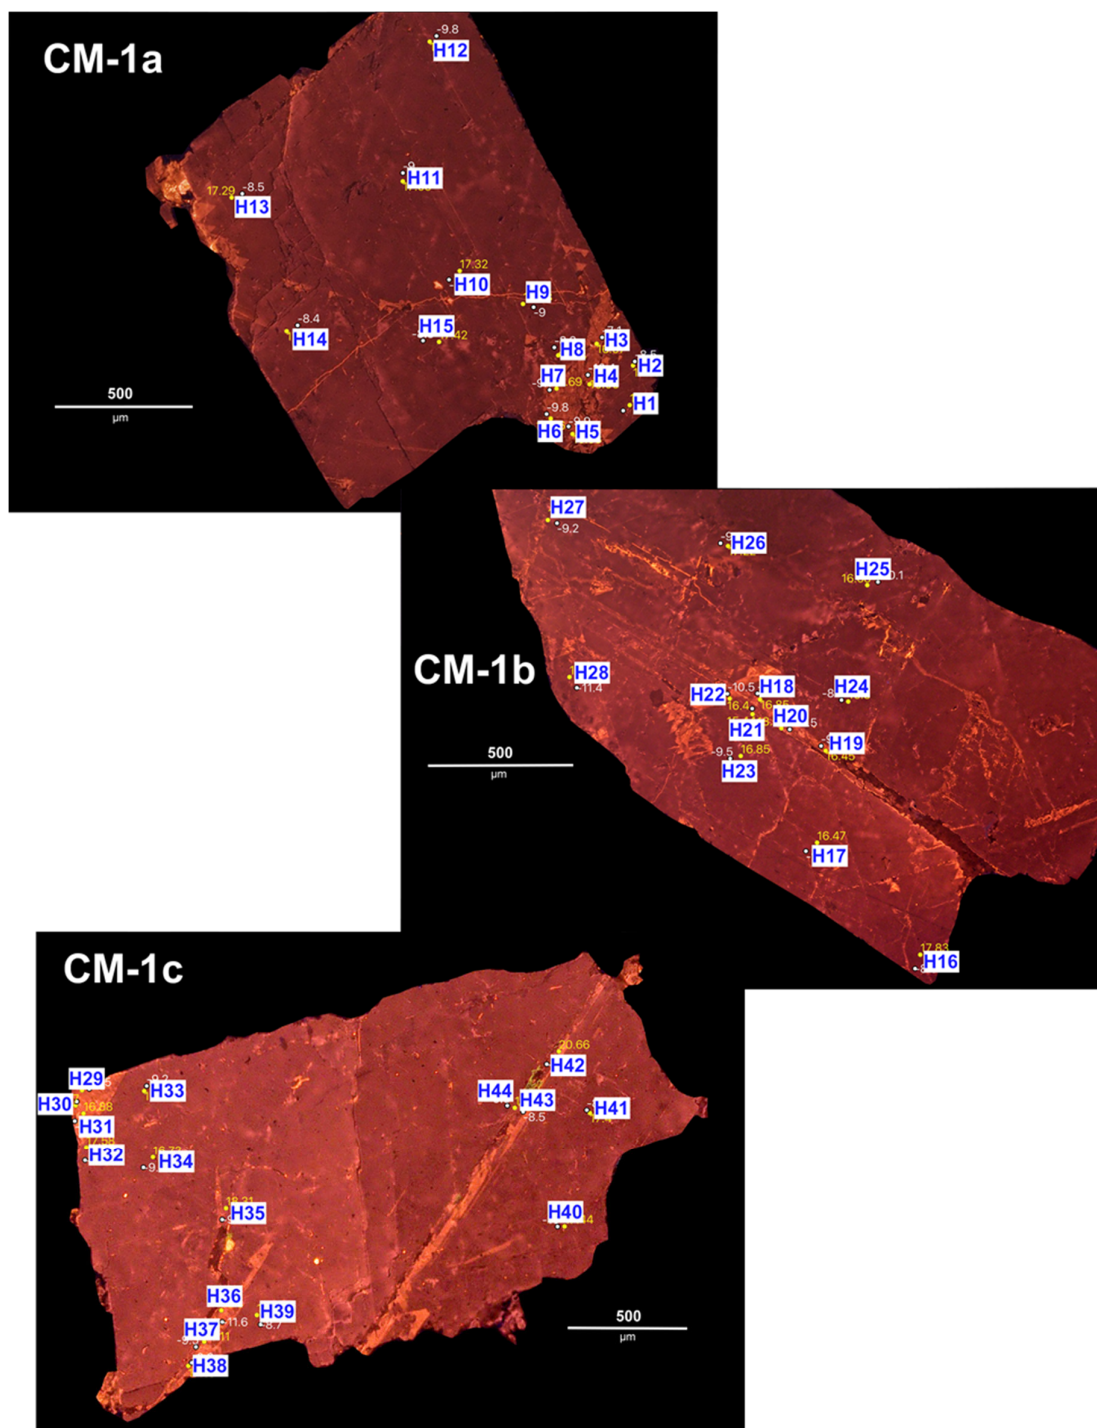

**Figure S8.** Spot Analysis Cathodoluminescence images of CM-1a, CM-1b, and CM-1c. These samples are from the Caledonia mine. Small circles represent spot location for oxygen and carbon isotopic determinations, the labels are the spot locations referenced in Table S9.

## References

1. Bornhorst, T.J.; Woodruff, L.G. Native copper precipitation by fluid-mixing Keweenaw Peninsula, Michigan. *Inst. Lake Super. Geol. Proc.* **1997**, 43 part 1, 9–10.
2. Bornhorst, T.J.; Barron, R.J.; and Whiteman, R.C. Caledonia Mine, Keweenaw Peninsula Native Copper District, Ontonagon County, Michigan. *Inst. Lake Super. Geol. Proc.* **2013**, 59 part 2, 43–57.
